# Supplementary material for: Thousands of human mutation clusters are explained by short-range template switching
Source: HighWire-hosted journal article supplement (doi:10.1101/gr.276478.121), 2022-06-27
Supplement: Supplemental_Fig_S3.pdf [file Supplemental_Fig_S3.pdf]

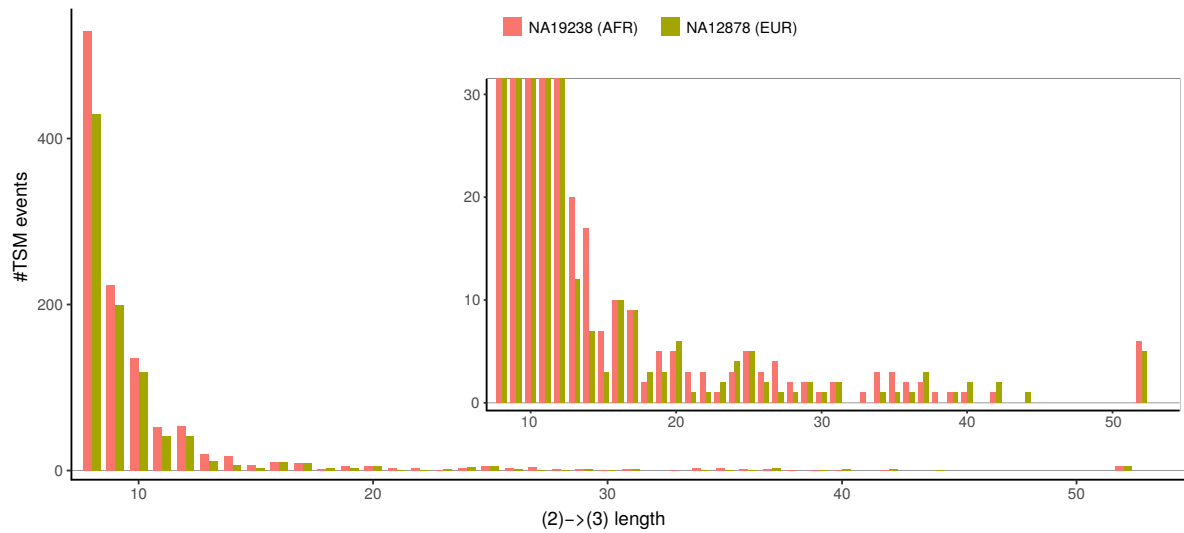

**Fig S3.** Lengths of inferred TSM events. A great majority of inferred TSM events are 10 bp or shorter in length. Despite the higher numbers of TSM loci identified in African samples, the length distribution of TSM events in individuals of African (NA19238) and European (NA12878) origin are similar. The inset shows lower values. Cases longer than 50 bp are grouped.
