# Supplementary material for: Thousands of human mutation clusters are explained by short-range template switching
Source: HighWire-hosted journal article supplement (doi:10.1101/gr.276478.121), 2022-06-27
Supplement: Supplemental_Fig_S7.pdf [file Supplemental_Fig_S7.pdf]

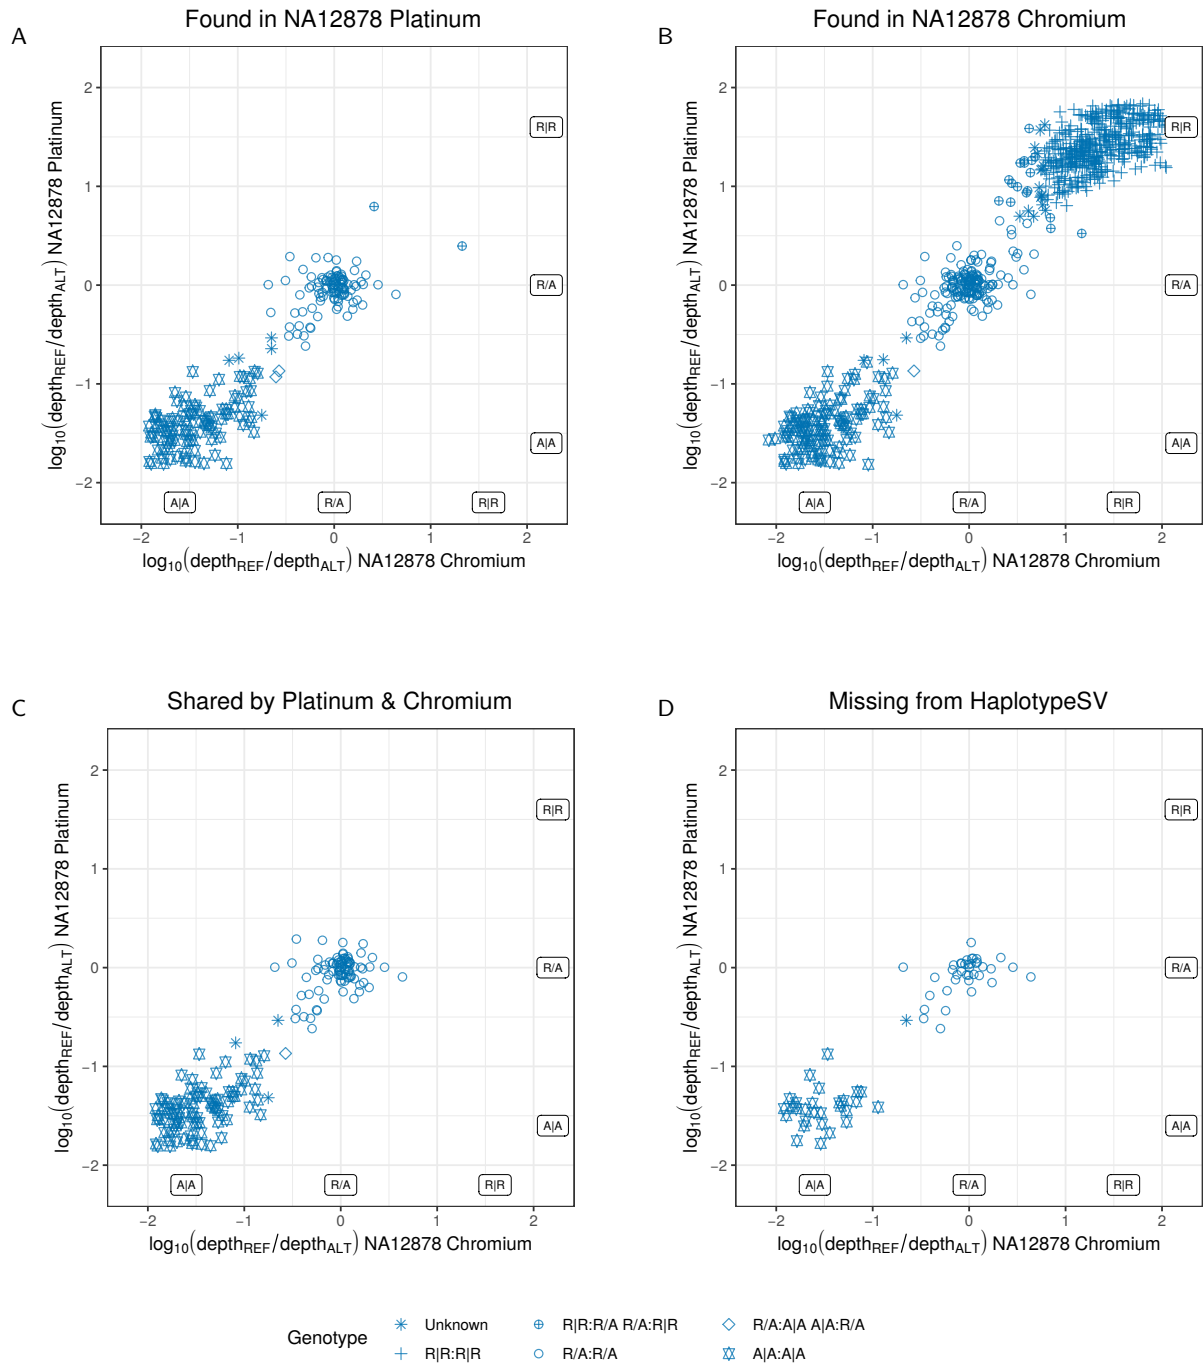

**Fig S7.** Genotyping of the TSM candidate loci found with short-read data. **(A)** The 211 candidate TSM loci found in NA12878 Platinum data passing the sequence-based filtering. Ratio of REF and ALT allele mapping coverage ( $r = \text{depth}_{\text{REF}}/\text{depth}_{\text{ALT}}$ ) reflects the genotype:  $r \approx 1$  (and thus  $\log_{10}(r) \approx 0$ ) for a heterozygote;  $r \ll 1$  and  $r \gg 1$  for the two types of homozygotes. The Log10-ratios agree for the NA12878 Platinum and Chromium datasets, and 105 and 96 loci (of the total 211) are called heterozygous and homozygous for ALT by both datasets. **(B)** Of the 755 candidate TSM loci found in NA12878 Chromium data, 438 are called homozygous for REF by both methods. **(C)** The 176 loci found in both short-read datasets. **(D)** The 67 loci found in both short-read datasets but not in HaplotypeSV dataset.
